# Supplementary material
Source: Springer Nature journal article supplement (https://www.springermedizin.de/resource/supplementary/12997_2011_76_MOESM2_ESM.pdf/9623270)

## How much the cough symptoms

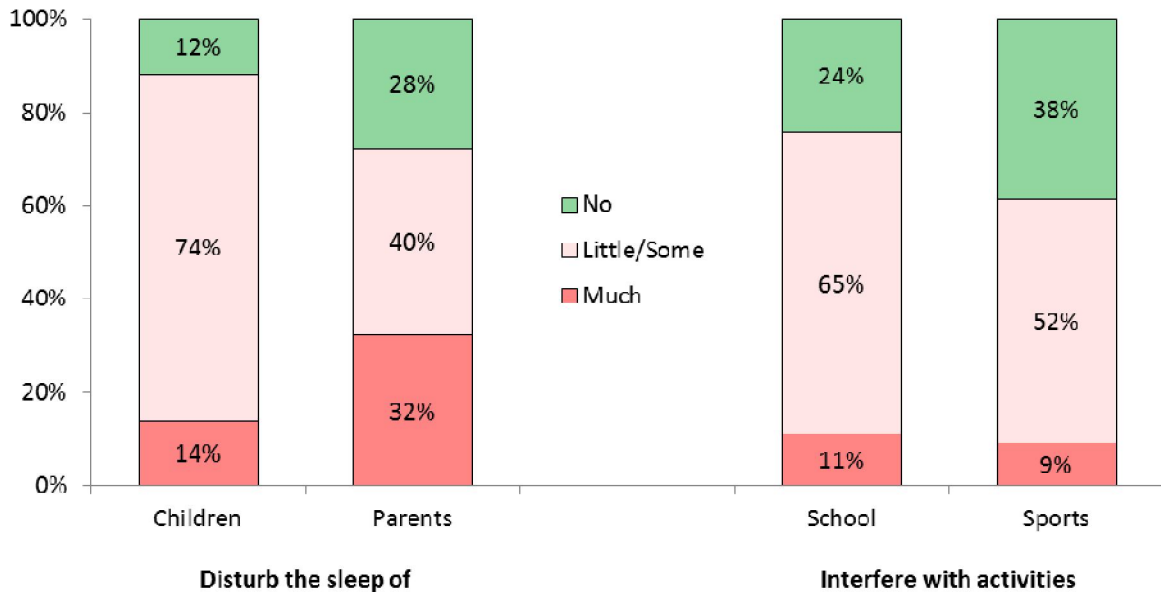

Supplement: MOESM2 [file 9623270]
